# Supplementary material for: A visible-light and temperature responsive host–guest system: the photoisomerization and inclusion complex formation of a ruthenium complex with cyclodextrins
Source: Royal Society of Chemistry journal article supplement (doi:10.1039/d1dt04003k), 2022-01-01
Supplement: d1dt04003k1.pdf [file d1dt04003k1.pdf]

## Supporting Information for

# A Visible-Light and Temperature Responsive Host-Guest System: Photoisomerization of a Ruthenium Complex and Inclusion Complex Formation with Cyclodextrins

Masanari Hirahara,\*<sup>a</sup> Shota Furutani,<sup>a</sup> Hiroki Goto,<sup>b</sup> Keiichi Fujimori,<sup>a</sup> Takayo, Kawakami-Moriuchi<sup>a</sup>

<sup>a</sup> Department of Applied Chemistry, Faculty of Engineering, Osaka Institute of Technology, 5-16-1 Omiya, Asahi Ward, Osaka, 535-8585

<sup>b</sup> Department of Applied Chemistry, School of Applied Science, National Defense Academy of Japan, 1-10-20 Hashirimizu, Yokosuka, Kanagawa, 239-8686

## Supporting Information

### Contents

|                                                                                                                                                                                            |     |
|--------------------------------------------------------------------------------------------------------------------------------------------------------------------------------------------|-----|
| Figure S1— <sup>1</sup> H NMR spectra of <i>proximal-1</i> during titration experiments with $\alpha$ -CD                                                                                  | S3  |
| Figure S2— <sup>1</sup> H NMR spectra of <i>proximal-1</i> during titration experiments with $\beta$ -CD                                                                                   | S4  |
| Figure S3— <sup>1</sup> H NMR spectra of <i>distal-1</i> during titration experiments with $\alpha$ -CD                                                                                    | S5  |
| Figure S4— <sup>1</sup> H NMR spectra of <i>distal-1</i> during titration experiments with $\beta$ -CD                                                                                     | S6  |
| Figure S5— <sup>1</sup> H NMR spectra of <i>proximal</i> -[Ru(C <sub>2</sub> tpy)(C <sub>2</sub> pyqu)OH <sub>2</sub> ] <sup>2+</sup> during titration experiments with $\gamma$ -CD       | S7  |
| Figure S6— <sup>1</sup> H NMR spectra of <i>proximal</i> -[Ru(tpy)(C <sub>10</sub> pyqu)OH <sub>2</sub> ] <sup>2+</sup> during titration experiments with $\gamma$ -CD                     | S8  |
| Figure S7—Benesi–Hildebrand plots from <sup>1</sup> H NMR titration between <i>proximal-1</i> and $\gamma$ -CD                                                                             | S9  |
| Figure S8—Benesi–Hildebrand plots from <sup>1</sup> H NMR titration between <i>proximal-1</i> and $\beta$ -CD                                                                              | S10 |
| Figure S9—Benesi–Hildebrand plots from <sup>1</sup> H NMR titration between <i>proximal-1</i> and $\alpha$ -CD                                                                             | S11 |
| Figure S10—Benesi–Hildebrand plots from <sup>1</sup> H NMR titration between <i>proximal</i> -[Ru(C <sub>2</sub> tpy)(C <sub>2</sub> pyqu)OH <sub>2</sub> ] <sup>2+</sup> and $\gamma$ -CD | S12 |

|                                                                                                                                                                            |     |
|----------------------------------------------------------------------------------------------------------------------------------------------------------------------------|-----|
| Figure S11—Benesi–Hildebrand plots from $^1\text{H}$ NMR titration between <i>proximal</i> -[Ru(tpy)(C <sub>10</sub> pyqu)OH <sub>2</sub> ] <sup>2+</sup> and $\gamma$ -CD | S13 |
| Figure S12—Benesi–Hildebrand plots from $^1\text{H}$ NMR titration between <i>distal-1</i> and $\gamma$ -CD                                                                | S14 |
| Figure S13—Benesi–Hildebrand plots from $^1\text{H}$ NMR titration between <i>distal-1</i> and $\beta$ -CD                                                                 | S15 |
| Figure S14—Benesi–Hildebrand plots from $^1\text{H}$ NMR titration between <i>distal-1</i> and $\alpha$ -CD                                                                | S16 |
| Figure S15— $^1\text{H}$ NMR spectra during thermal back isomerization from <i>distal-1</i> to <i>proximal-1</i> at 293 K                                                  | S17 |
| Figure S16—Kinetic traces for thermal back isomerization from <i>distal-1</i> to <i>proximal-1</i> in the absence and presence of $\gamma$ -CD.                            | S18 |
| Figure S17—Arrhenius and Eyring plots for thermal-back-isomerization from <i>distal-1</i> to <i>proximal-1</i> .                                                           | S19 |
| Figure S18—Kinetic traces for thermal back isomerization at 333K in the presence of cyclodextrins                                                                          | S20 |
| Table S1—Summary of thermodynamic parameters for thermal-back-isomerization                                                                                                | S21 |
| References                                                                                                                                                                 | S22 |

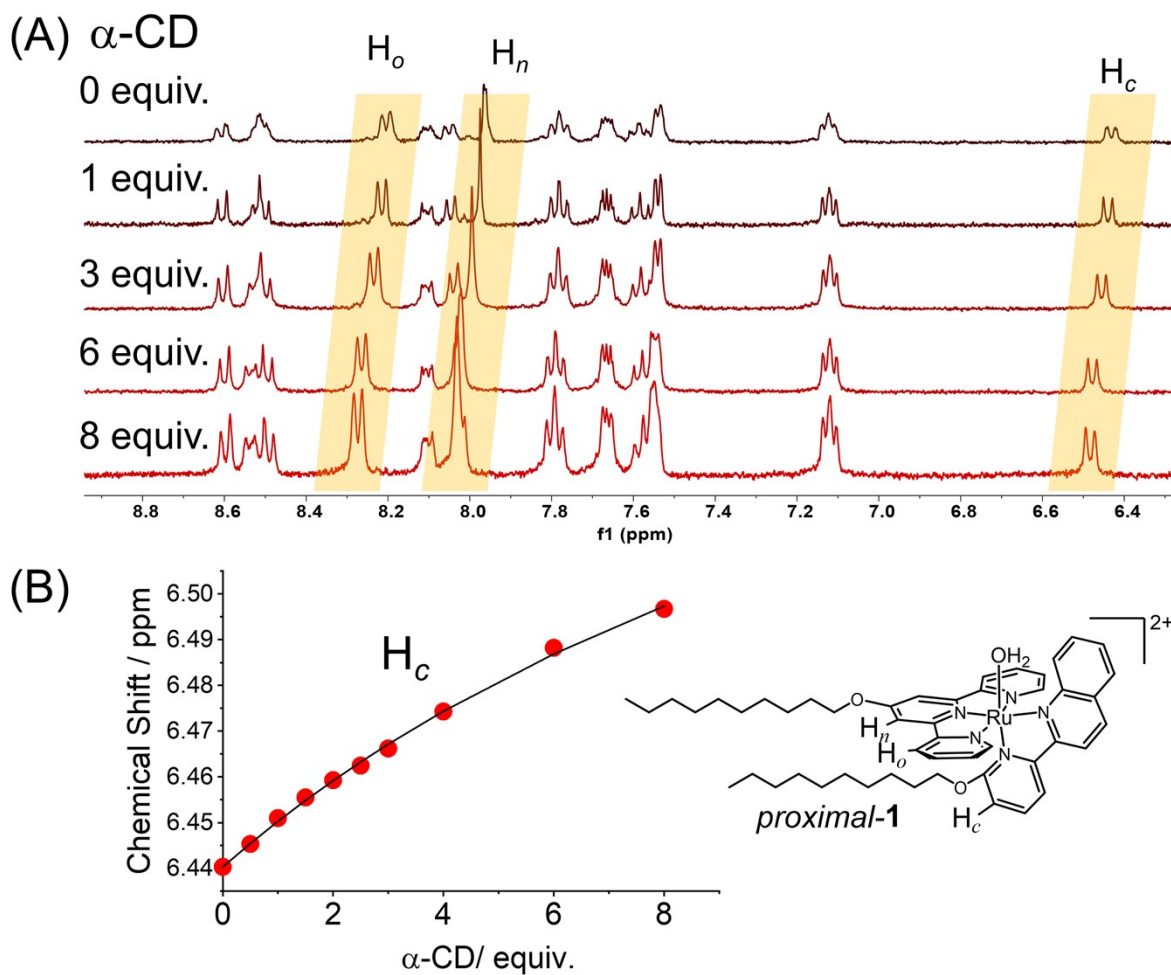

**Figure S1.** (A)  $^1\text{H}$  NMR spectra of *proximal-1* (1.55 mM) during titration experiments with  $\alpha$ -CD in  $\text{D}_2\text{O}$ ,  $\text{CD}_3\text{OD}$ , and TFE mixed solvent ( $v/v/v = 70:40:2$ ). Peaks of  $H_o$ ,  $H_n$ , and  $H_c$  protons are highlighted. (B) Plots of chemical shifts of  $H_c$  proton verses equivalents of  $\alpha$ -CD.

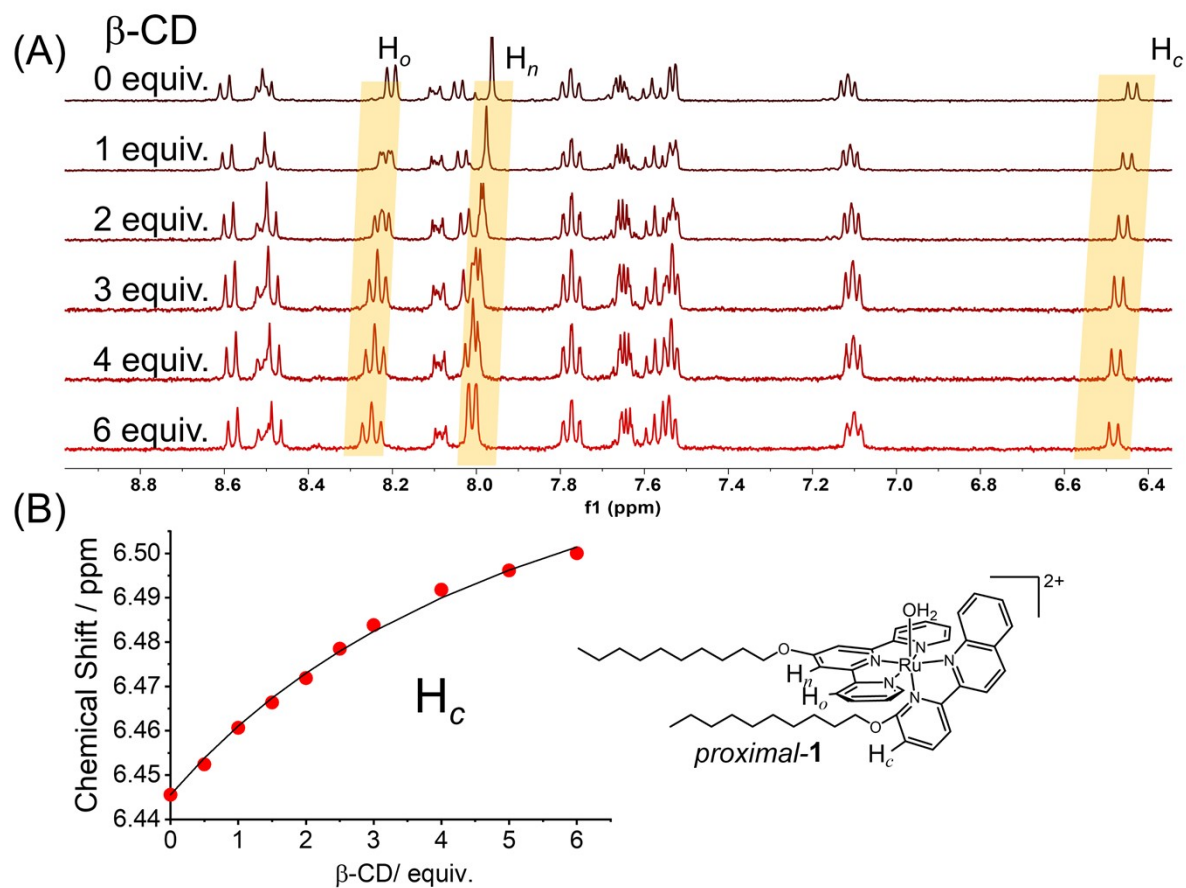

**Figure S2.** (A)  $^1\text{H}$  NMR spectra of *proximal-1* (0.84 mM) during titration experiments with  $\beta$ -CD in  $\text{D}_2\text{O}$ ,  $\text{CD}_3\text{OD}$ , and TFE mixed solvent (v/v/v = 70:40:2). Peaks of  $H_o$ ,  $H_n$ , and  $H_c$  protons are highlighted. (B) Plots of chemical shifts of  $H_c$  proton verses equivalents of  $\beta$ -CD.

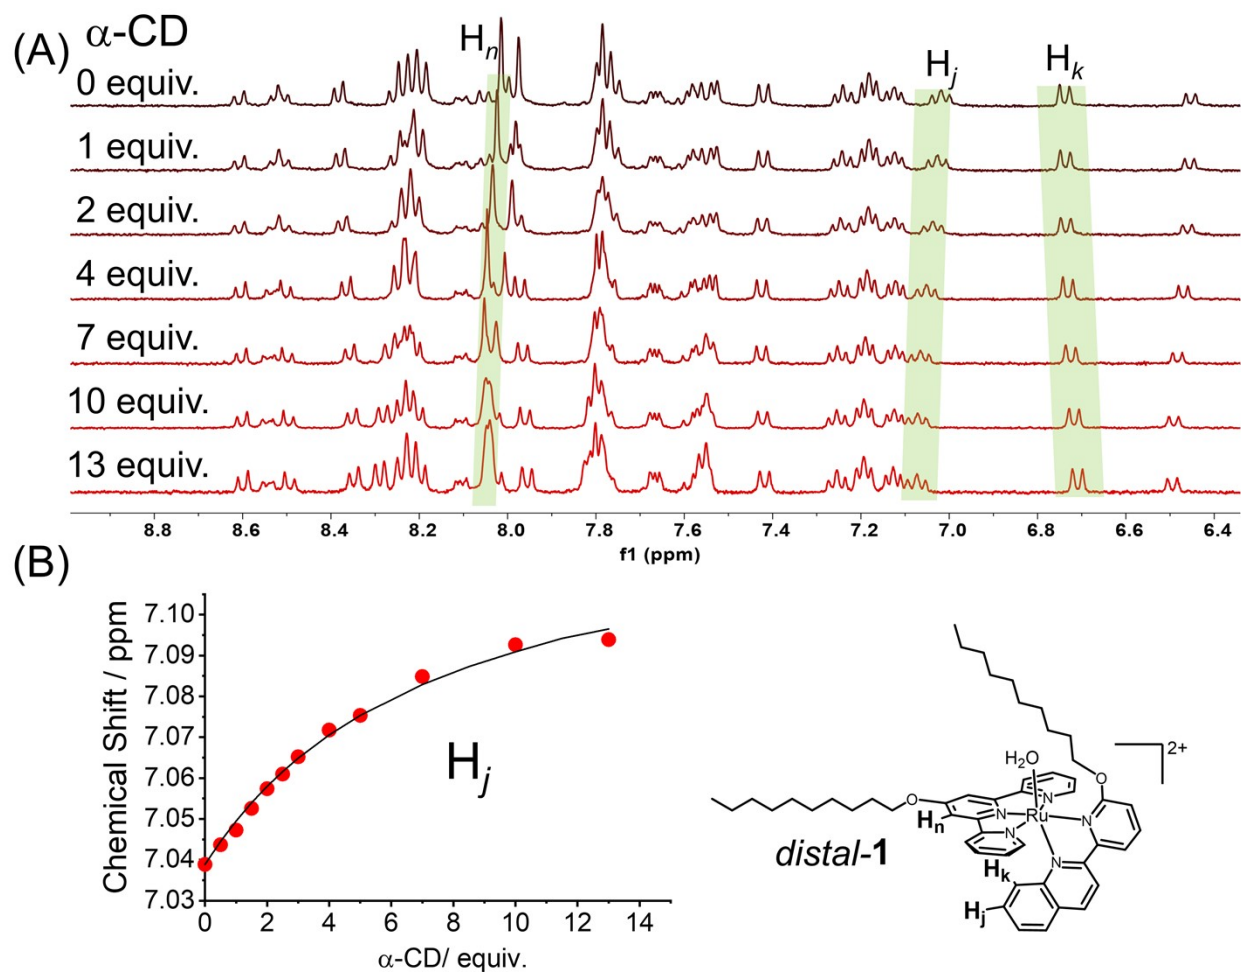

**Figure S3.** (A)  $^1\text{H}$  NMR spectra of *proximal-1* and *distal-1* (total concentration: 1.36 mM, *proximal-1* : *distal-1* = 36 : 64) during titration experiments with  $\alpha$ -CD in mixed aqueous solutions ( $\text{D}_2\text{O}$  :  $\text{CD}_3\text{OD}$  : TFE = 70 : 50 : 2). Peaks of  $\text{H}_n$ ,  $\text{H}_j$ , and  $\text{H}_k$  protons for *distal-1* are highlighted. (B) Plots of chemical shifts of  $\text{H}_j$  proton versus equivalents of  $\alpha$ -CD.

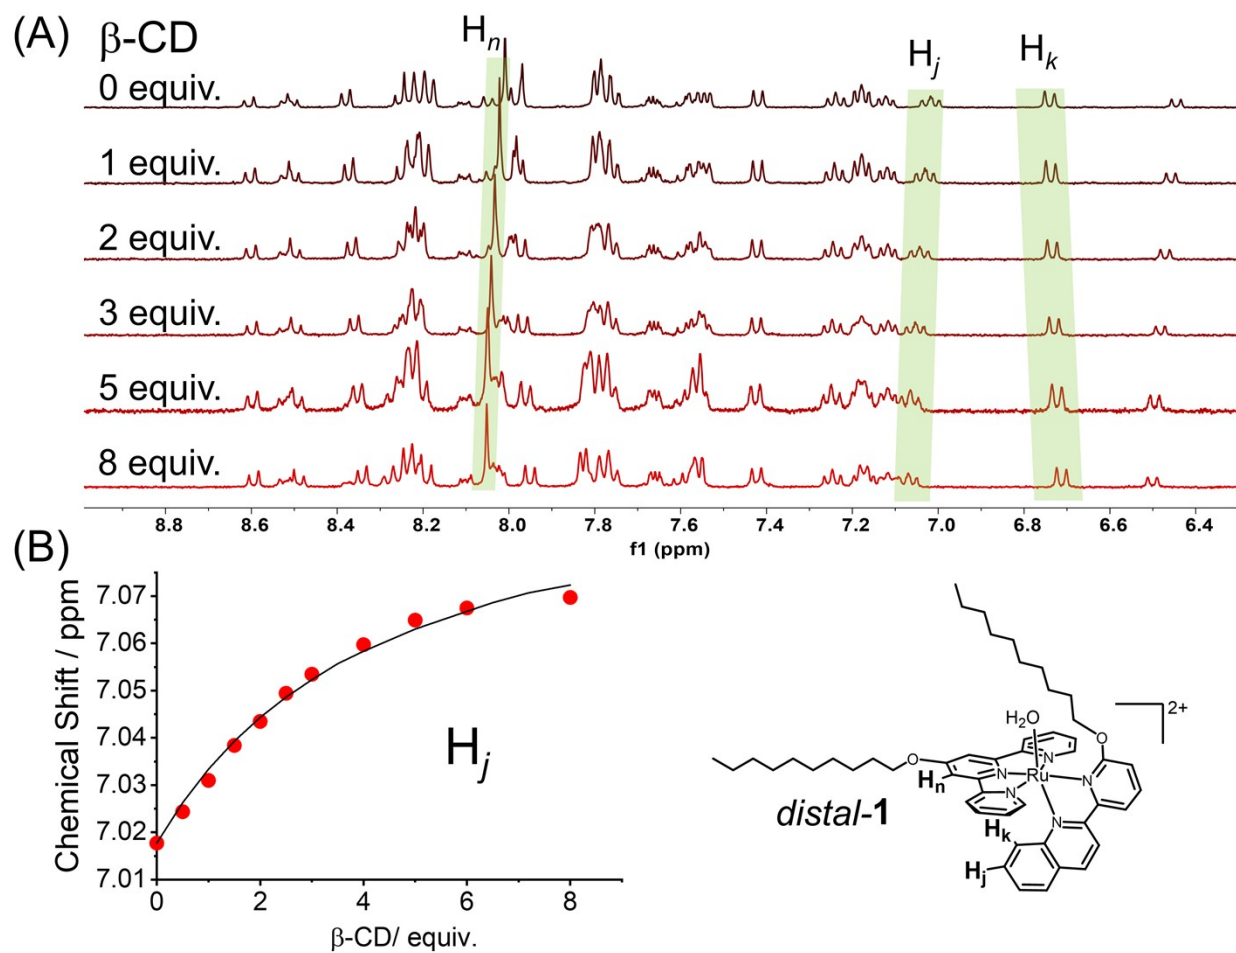

**Figure S4.** (A)  $^1\text{H}$  NMR spectra of *proximal-1* and *distal-1* (total concentration: 0.88 mM, *proximal-1* : *distal-1* = 36 : 64) during titration experiments with  $\beta$ -CD in mixed aqueous solutions ( $\text{D}_2\text{O}$  :  $\text{CD}_3\text{OD}$  : TFE = 70 : 40 : 2). Peaks of  $H_n$ ,  $H_j$ , and  $H_k$  protons for *distal-1* are highlighted. (B) Plots of chemical shifts of  $H_j$  proton versus equivalents of  $\beta$ -CD, respectively.

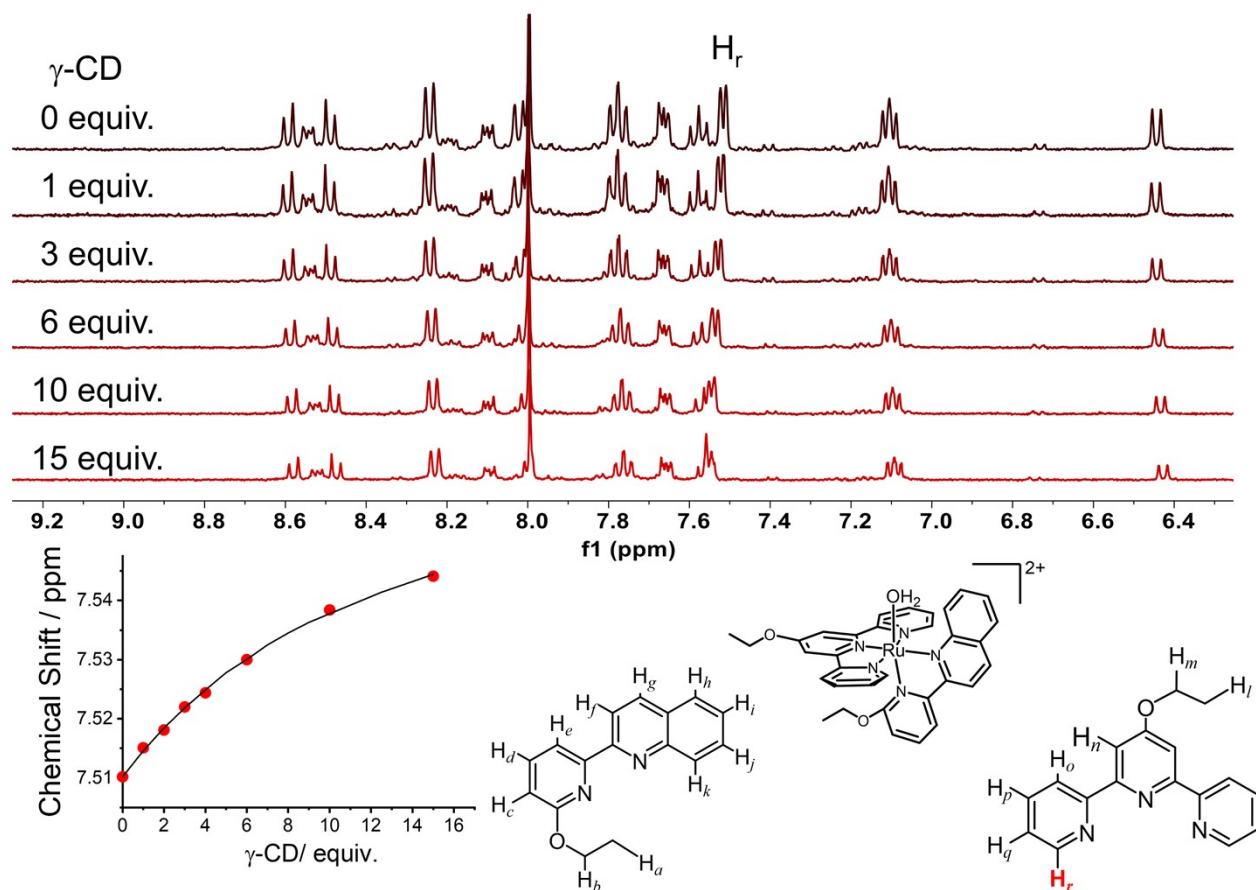

**Figure S5.** (A) <sup>1</sup>H NMR spectra of proximal-[Ru(C<sub>2</sub>tpy)(C<sub>2</sub>pyqu)OH<sub>2</sub>]<sup>2+</sup> (1.63 mM) during titration experiments with γ-CD in D<sub>2</sub>O, CD<sub>3</sub>OD, and TFE mixed solvent (v/v/v = 70:40:2). (B) Plots of chemical shifts of H<sub>r</sub> proton versus equivalents of γ-CD. Small peaks correspond to distal-[Ru(C<sub>2</sub>tpy)(C<sub>2</sub>pyqu)OH<sub>2</sub>]<sup>2+</sup>.<sup>1</sup>



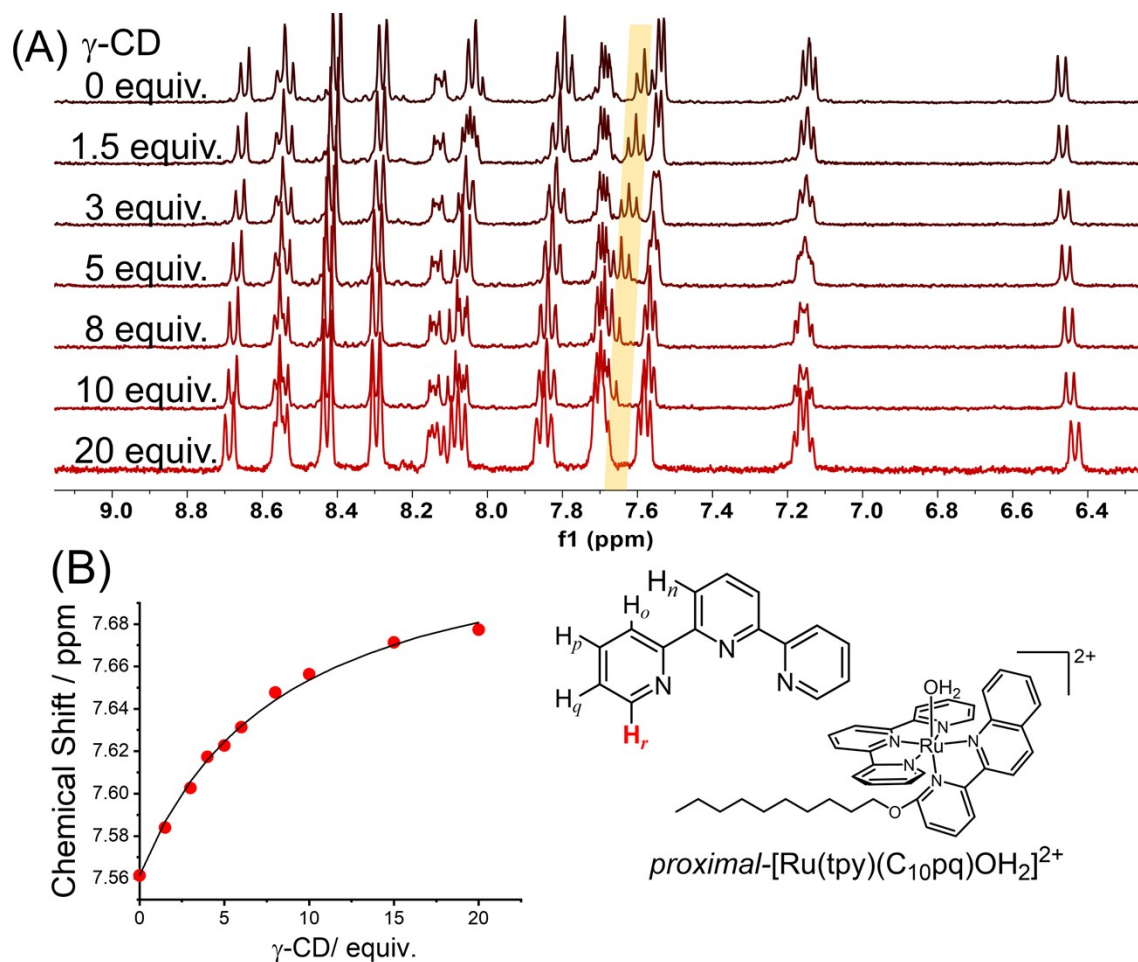

**Figure S6.** (A)  $^1\text{H}$  NMR spectra of *proximal*-[Ru(tpy)(C<sub>10</sub>pyqu)OH<sub>2</sub>]<sup>2+</sup> (1.58 mM) during titration experiments with  $\gamma$ -CD in D<sub>2</sub>O, CD<sub>3</sub>OD, and TFE mixed solvent (v/v/v = 70:40:2). (B) Plots of chemical shifts of H<sub>r</sub> proton versus equivalents of  $\gamma$ -CD.



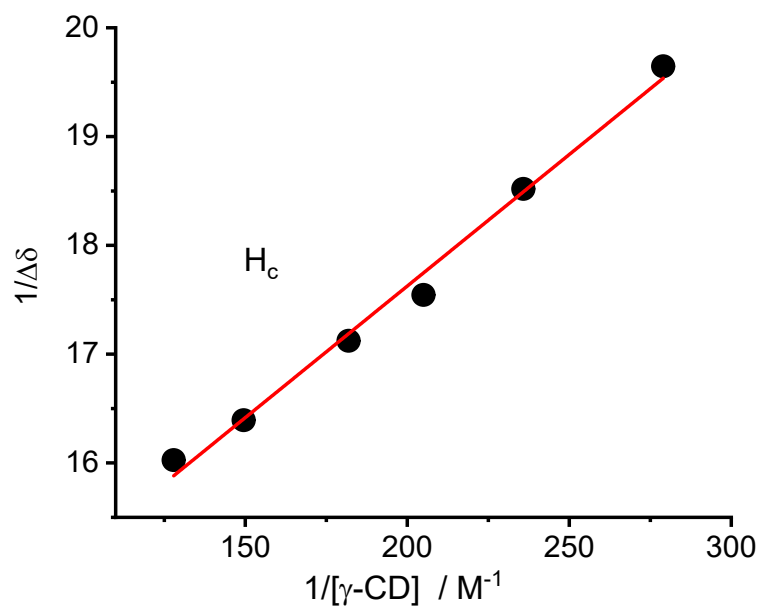

**Figure S7.** Benesi–Hildebrand plots from  $^1\text{H}$  NMR titration between *proximal-1* and  $\gamma\text{-CD}$ .

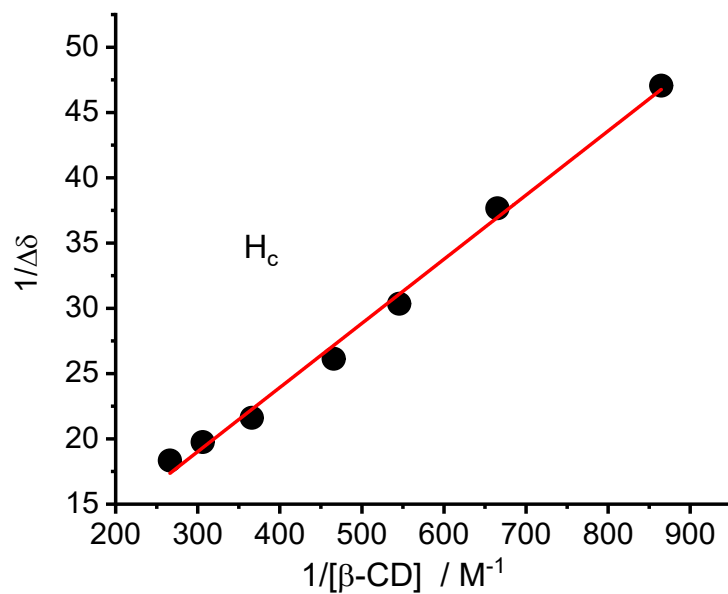

**Figure S8.** Benesi–Hildebrand plots from  $^1\text{H}$  NMR titration between *proximal-1* and  $\beta\text{-CD}$ .

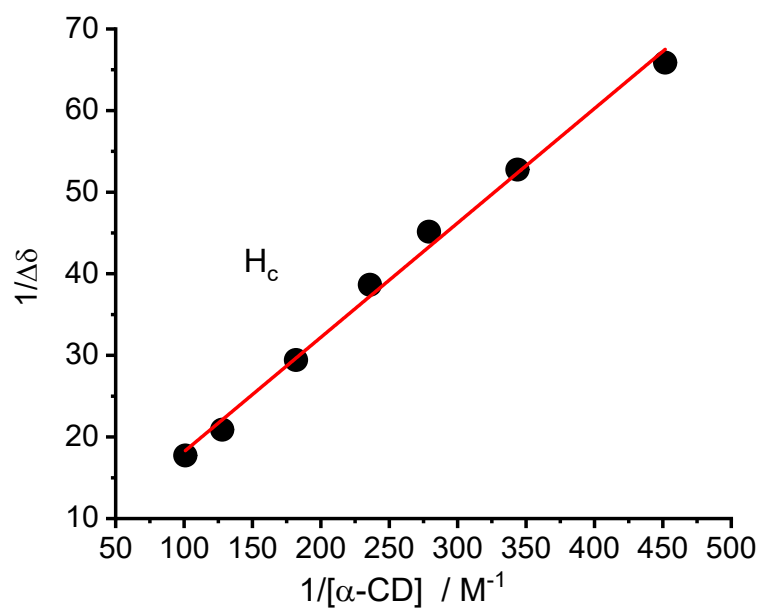

**Figure S9.** Benesi–Hildebrand plots from  $^1\text{H}$  NMR titration between *proximal-1* and  $\alpha\text{-CD}$ .

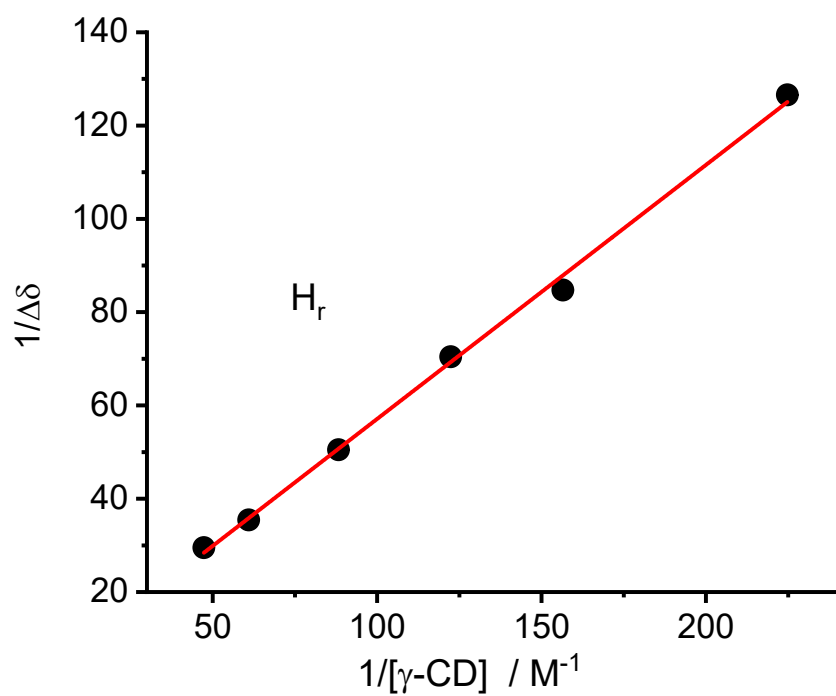

**Figure S10.** Benesi-Hildebrand plots from  $^1\text{H}$  NMR titration between *proximal*- $[\text{Ru}(\text{C}_2\text{tpy})(\text{C}_2\text{pyqu})\text{OH}_2]^{2+}$  and  $\gamma$ -CD.

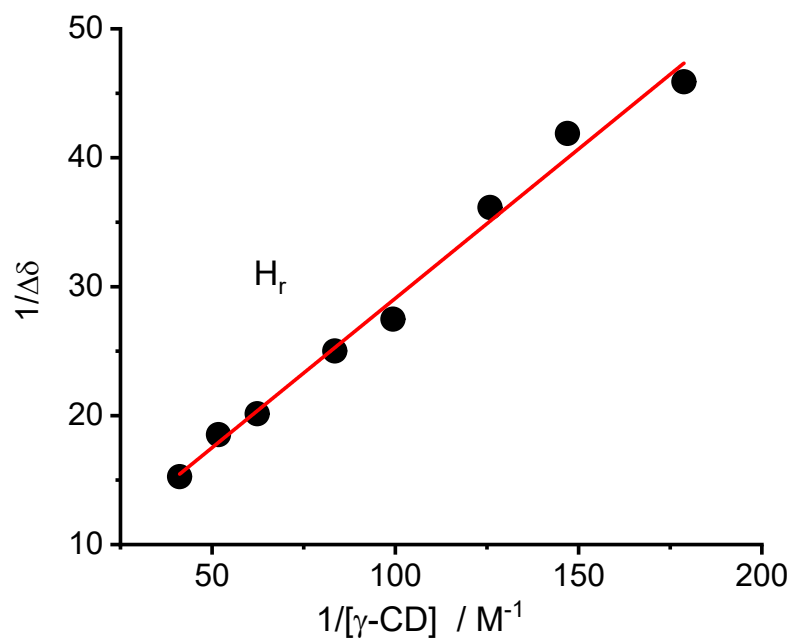

**Figure S11.** Benesi–Hildebrand plots from  $^1\text{H}$  NMR titration between *proximal*- $[\text{Ru}(\text{tpy})(\text{C}_{10}\text{pyqu})\text{OH}_2]^{2+}$  and  $\gamma\text{-CD}$ .

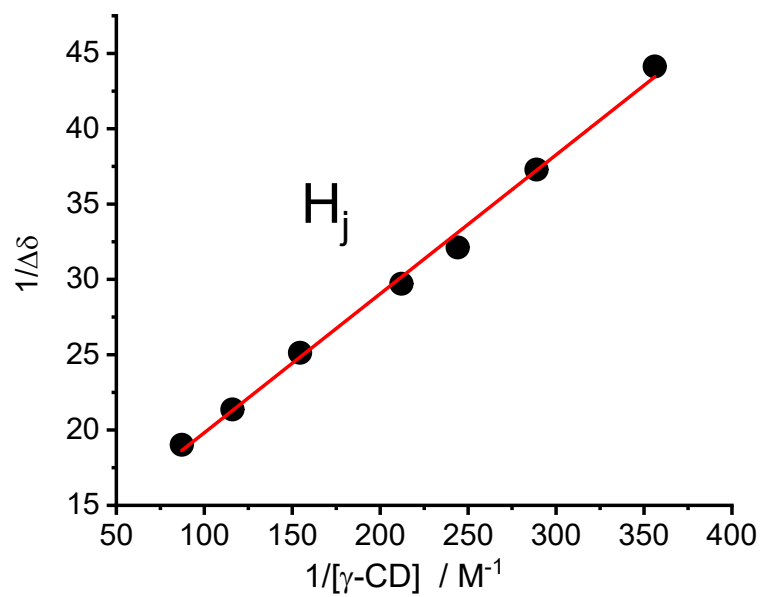

**Figure S12.** Benesi-Hildebrand plots from  $^1\text{H}$  NMR titration between *distal-1* and  $\gamma\text{-CD}$ .

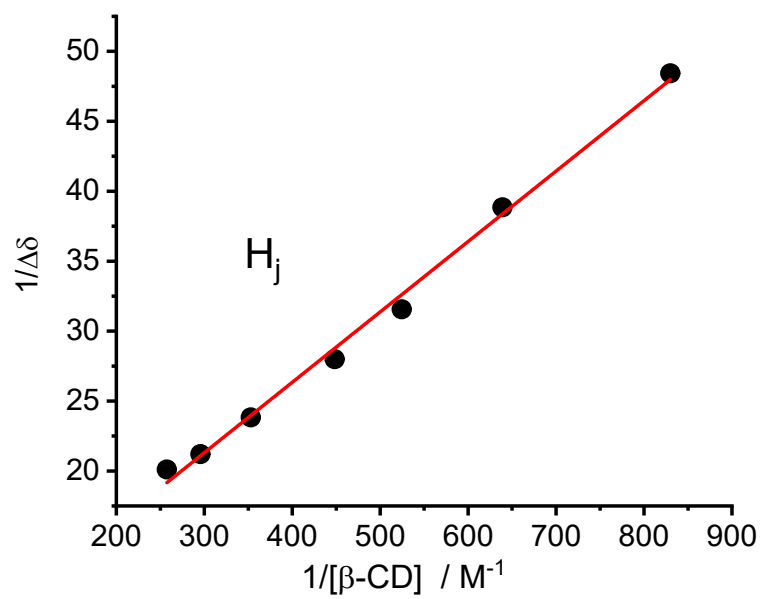

**Figure S13.** Benesi-Hildebrand plots from  $^1\text{H}$  NMR titration between *distal-1* and  $\beta\text{-CD}$ .



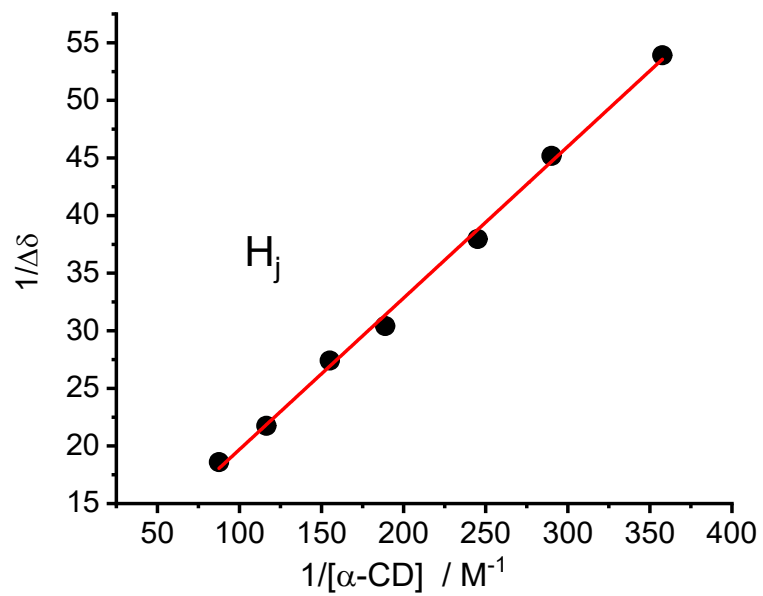

**Figure S14.** Benesi-Hildebrand plots from  $^1\text{H}$  NMR titration between *distal-1* and  $\alpha\text{-CD}$ .

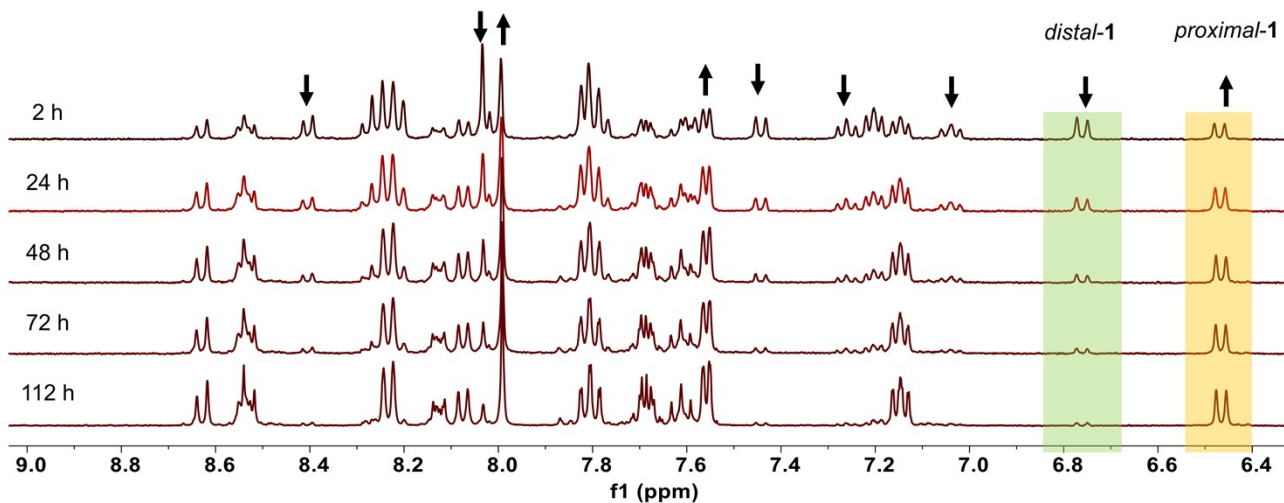

**Figure S15.** <sup>1</sup>H NMR spectra during thermal back isomerization from *distal-1* to *proximal-1* at 293 K. The sample solution was prepared by light irradiation to an aqueous solution of *proximal-1* (1.5 mM) in mixed aqueous solution (D<sub>2</sub>O : CD<sub>3</sub>OD : TFE = 70 : 50 : 2). H<sub>k</sub> proton of *distal-1* and H<sub>c</sub> proton of *proximal-1* were highlighted with green and orange, respectively. The progress of the reaction was monitored in the dark.

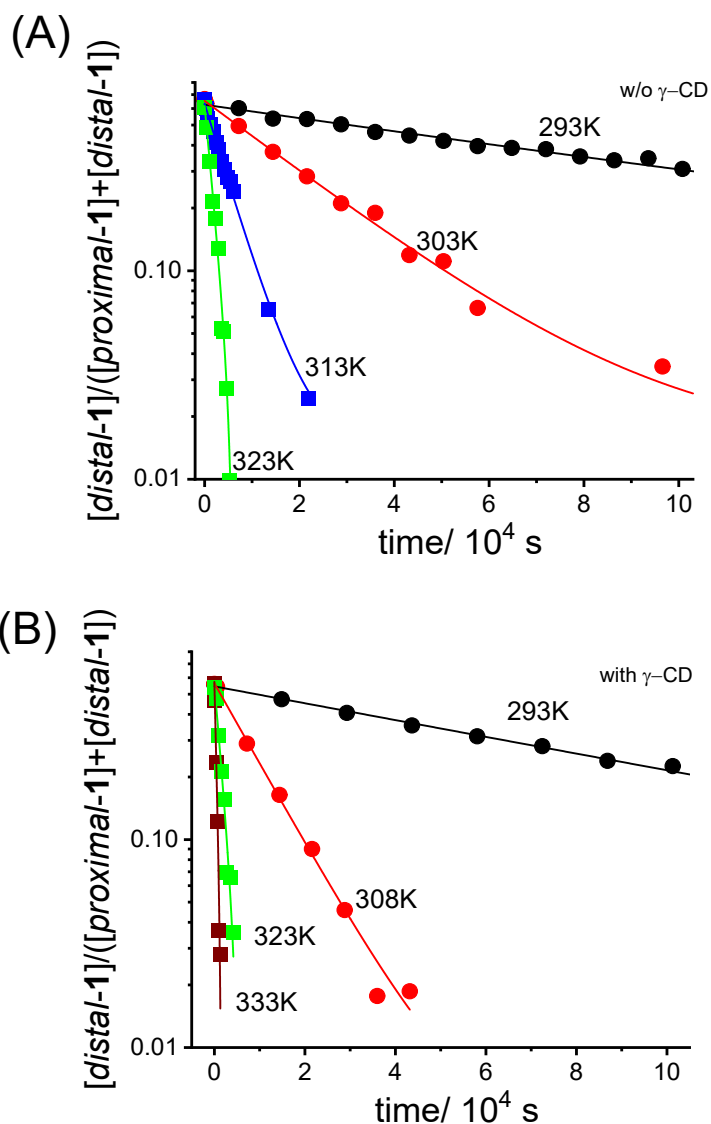

**Figure S16.** Kinetic traces for thermal back isomerization from *distal-1* to *proximal-1* at various temperatures. (A) Traces at 293, 303, 313, and 323 K in the absence of a host molecule. (B) Traces at 293, 308, 323, and 333 K in the presence of 5 equiv. of  $\gamma$ -CD. The concentration of *distal-1* was estimated based on the integration of an H<sub>c</sub> proton for *proximal-1* and an H<sub>k</sub> proton for *distal-1*, respectively.

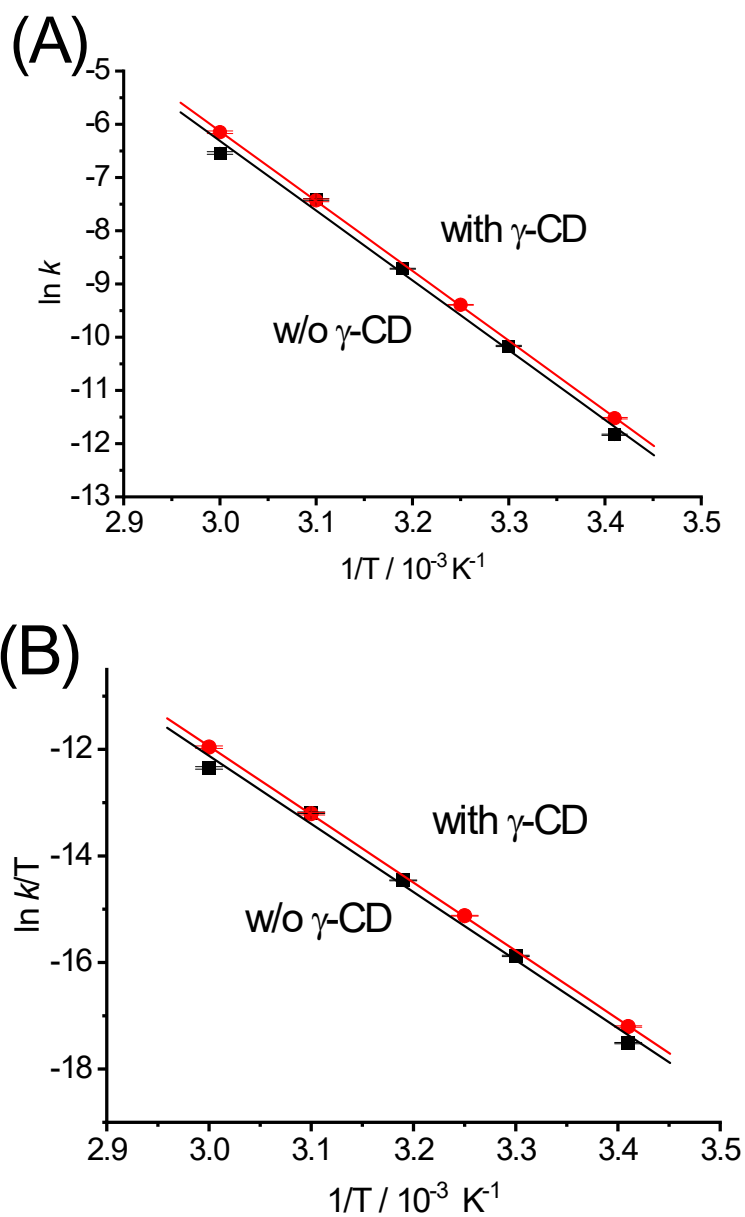

**Figure S17.** (A) Arrhenius and (B) Eyring plots for the thermal-back-isomerization from *distal-1* to *proximal-1*. Plots for the isomerization in the absence and presence of  $\gamma$ -CD are plotted with black square and red circle, respectively.

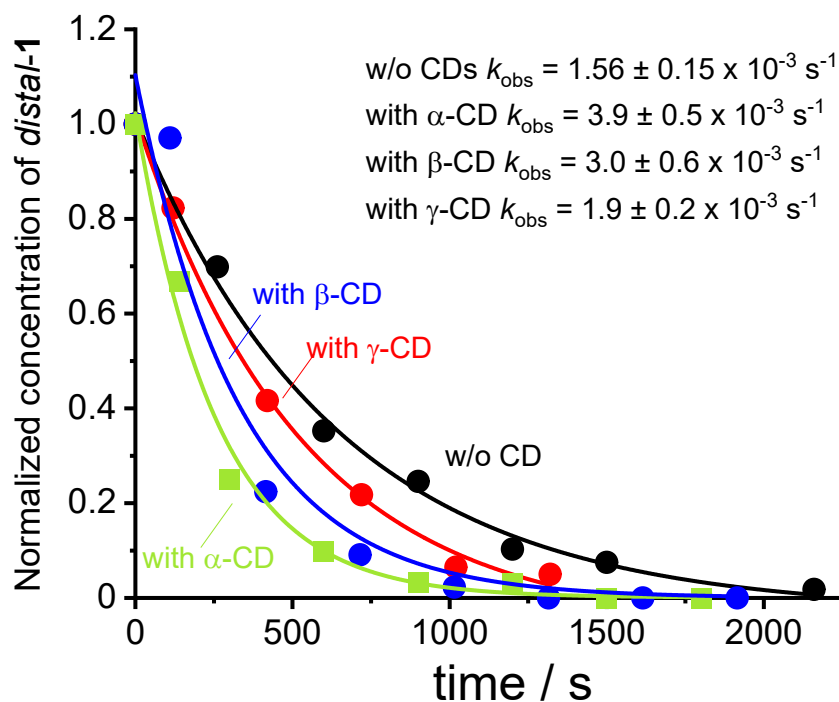

**Figure S18.** Kinetic traces for thermal back isomerization from *distal-1* to *proximal-1* at 333K in the absence or presence of cyclodextrins. The sample solution of *distal-1* and *proximal-1* in the photostationary state was prepared by light irradiation to an aqueous solution of *proximal-1* in the mixed aqueous solution (D<sub>2</sub>O : CD<sub>3</sub>OD : TFE = 70 : 50 : 2) prior to the measurements. Black: in the absence of cyclodextrins ( $c_{Ru} = 1.52$  mM), red: in the presence of  $\gamma$ -CD ( $c_{Ru} = 1.38$  mM,  $[\gamma\text{-CD}] = 7.1$  mM), blue; in the presence of  $\beta$ -CD ( $c_{Ru} = 0.70$  mM,  $[\beta\text{-CD}] = 3.5$  mM), and green; in the presence of  $\alpha$ -CD ( $c_{Ru} = 1.35$  mM,  $[\alpha\text{-CD}] = 6.35$  mM). The initial concentration was normalized for comparison.  $c_{Ru} = [proximal-1] + [distal-1]$ .

**Table S1.** Summary of thermodynamic parameters for thermal-back-isomerization from *distal-1* to *proximal-1* in the absence and presence of  $\gamma$ -CD (5 equiv.)

|                   | $E_{\text{act}} / \text{kJ mol}^{-1}$ | $\Delta H^{\ddagger} / \text{kJ mol}^{-1}$ | $\Delta S^{\ddagger} / \text{J mol}^{-1} \text{K}^{-1}$ | $\Delta G^{\ddagger} / \text{kJ mol}^{-1}$ |
|-------------------|---------------------------------------|--------------------------------------------|---------------------------------------------------------|--------------------------------------------|
| With $\gamma$ -CD | $109 \pm 1$                           | $106 \pm 1$                                | $22 \pm 2$                                              | $99 \pm 1$                                 |
| w/o $\gamma$ -CD  | $109 \pm 5$                           | $106 \pm 5$                                | $21 \pm 17$                                             | $100 \pm 7$                                |

## References

1. Hirahara, M.; Goto, H.; Yagi, M.; Umemura, Y., A multi-stimuli responsive ruthenium complex for catalytic water oxidation. *Chem. Commun.* **2020**, 56 (84), 12825-12828.
